# Supplementary material for: Microbial community spatial structures in Luzhou-flavored liquor pit muds with different brewing materials
Source: PeerJ journal article supplement (doi:10.7717/peerj.12987), 2022-03-08
Supplement: Figure_S2.pdf [file Figure_S2.pdf]

PC2 (19.23%)

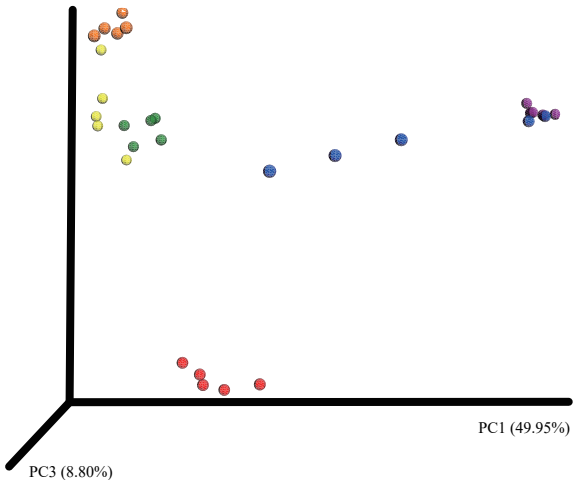

PC1 (49.95%)

PC3 (8.80%)

 BPM3G

 BPM5G

 MPM3G

 MPM5G

 UPM3G

 UPM5G
