# Supplementary material for: Microbial community spatial structures in Luzhou-flavored liquor pit muds with different brewing materials
Source: PeerJ journal article supplement (doi:10.7717/peerj.12987), 2022-03-08

(A)

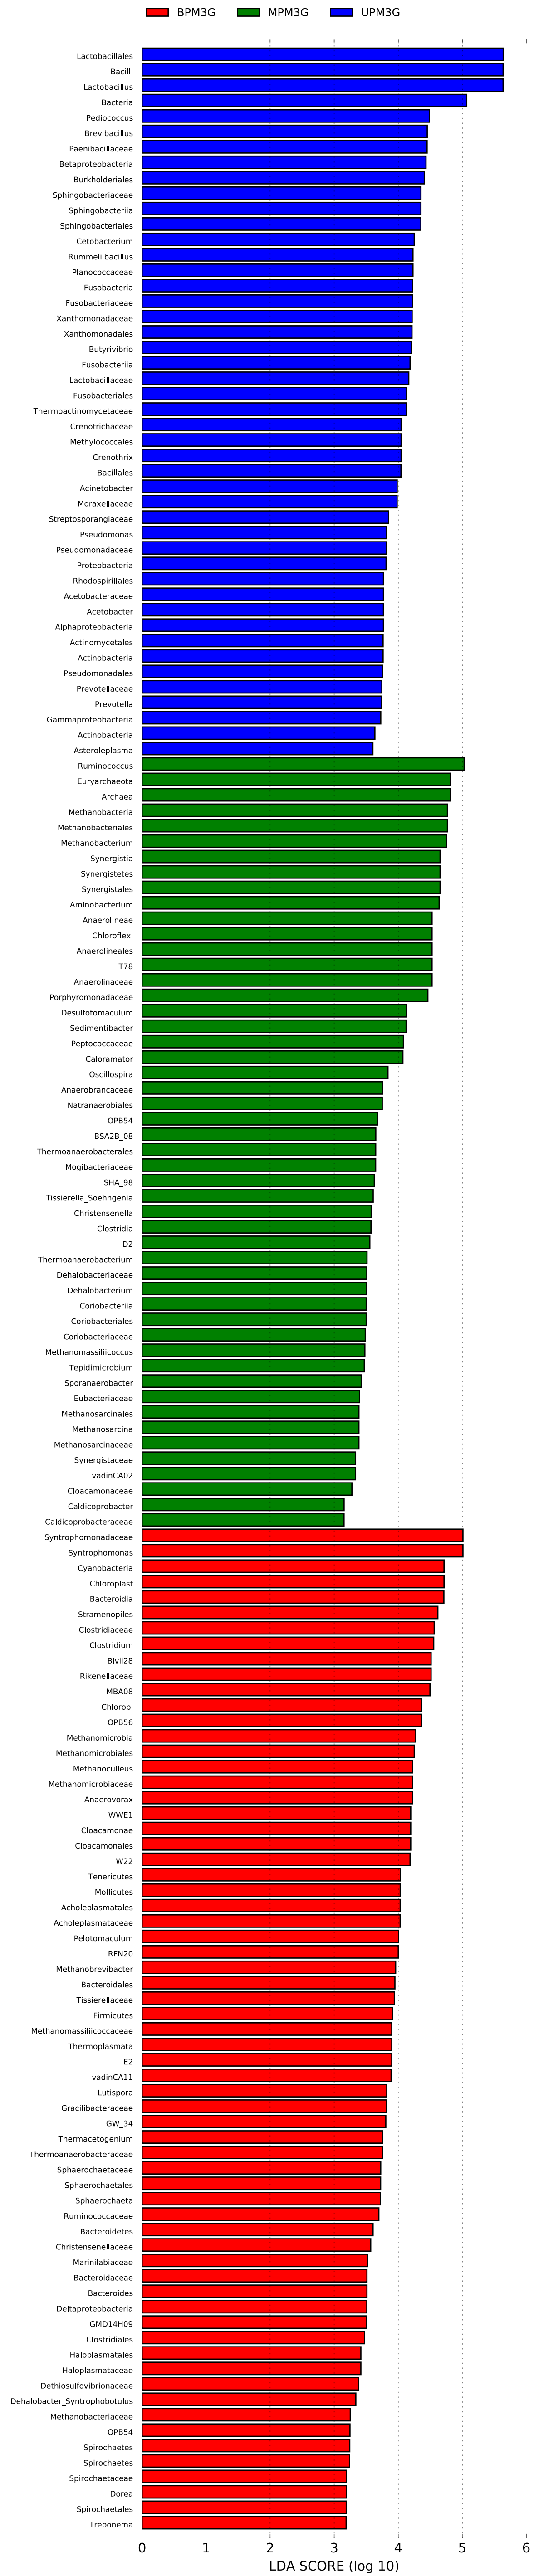

(B)

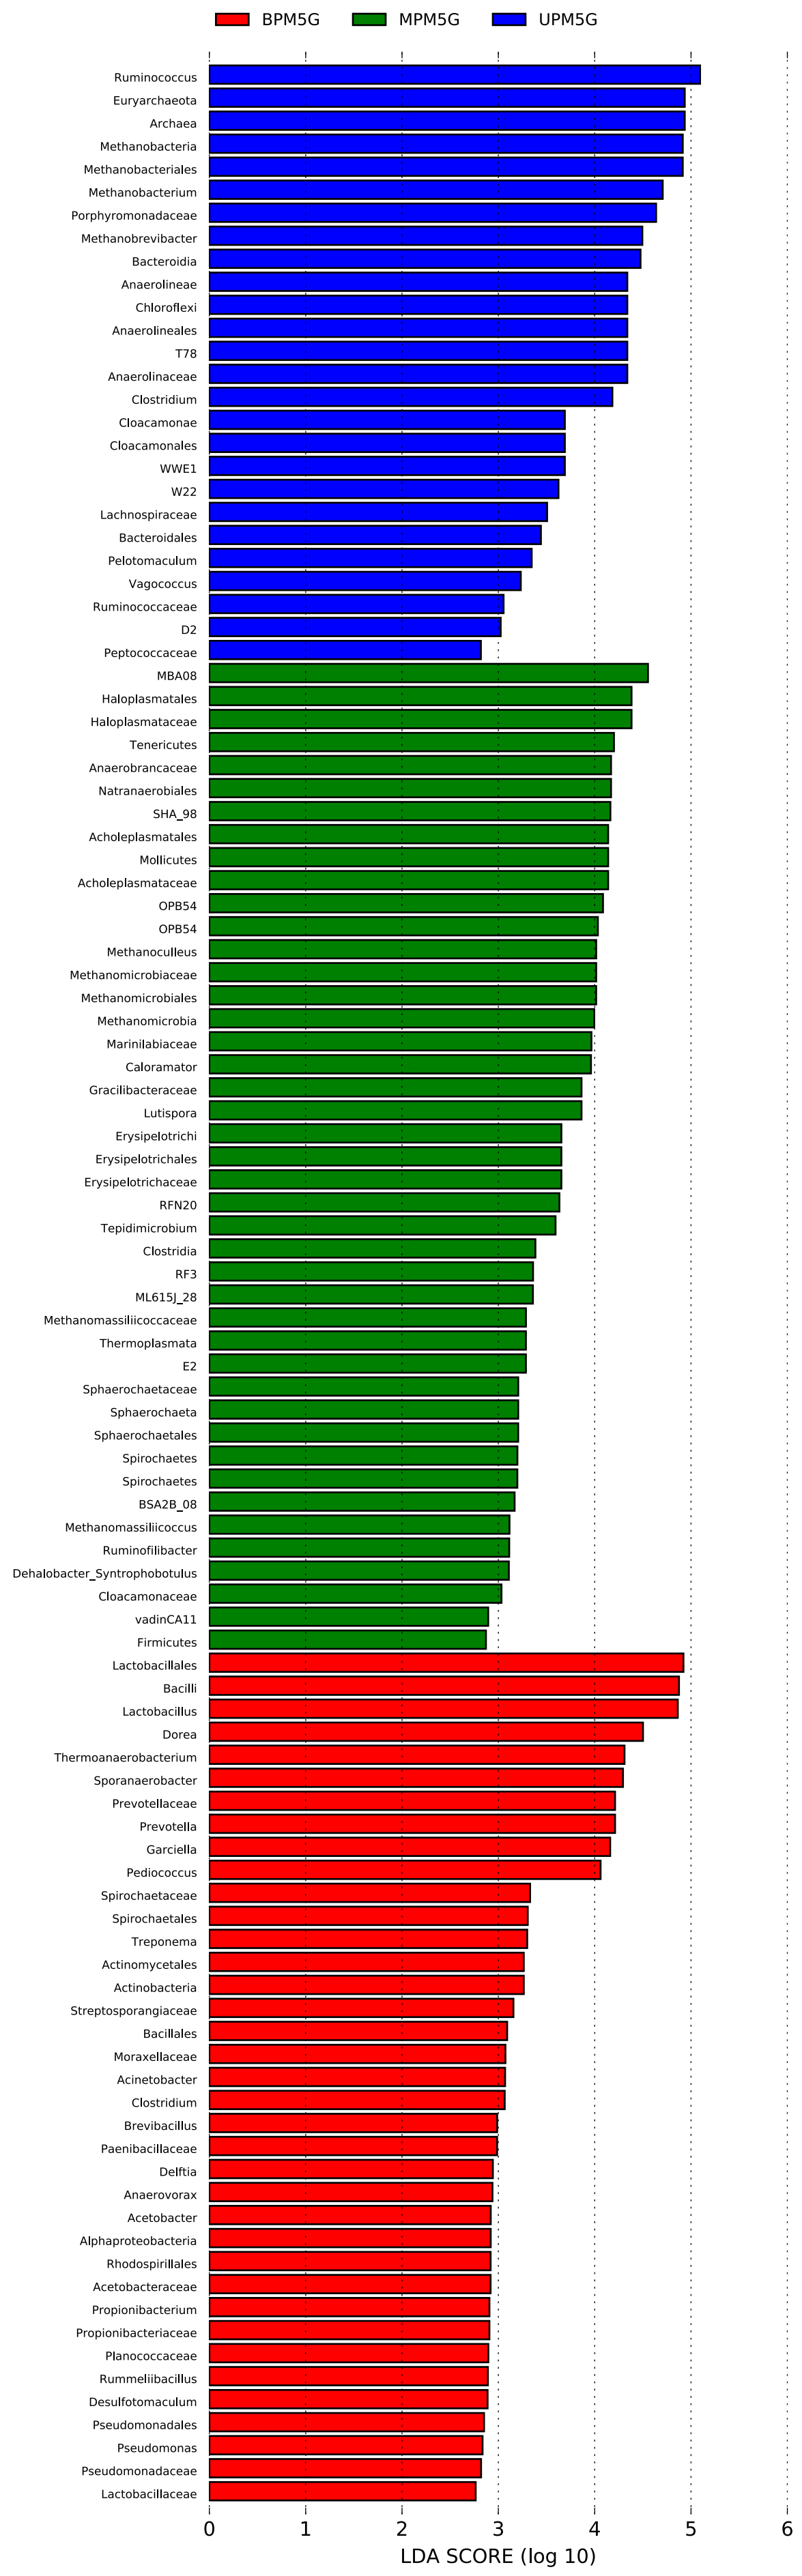

Supplement: Figure_S6.pdf [file Figure_S6.pdf]
